# Supplementary material for: Effective bolus dose of remimazolam for i-gel® insertion in nonparalyzed patients: a dose-finding study
Source: Springer Nature journal article supplement (doi:10.1007/s12630-024-02762-w), 2024-04-26
Supplement: MOESM1 [file 27022214]

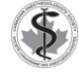

---

## ELECTRONIC SUPPLEMENTARY MATERIAL

### **Cho E *et al.*: Effective bolus dose of remimazolam for i-gel<sup>®</sup> insertion in nonparalyzed patients: a dose-finding study**

*Disclaimer: Electronic Supplementary Material (ESM) is supplied by the authors for the benefit of readers. This feature is intended to provide additional information, context, and/or dimension to complement articles. Readers should be aware that unlike the main print manuscript, ESM may not undergo extensive peer review and typically is posted as supplied by the authors without editing, proofreading, accuracy checking, copyediting, or typesetting; it is published online only.*

#### TABLE OF CONTENTS

**eTable**      Insertion condition grading scale with six categories

**eAppendix**      Simulation to evaluate the coverage of the confidence interval for the 95% effective dose of remimazolam

**eTable** Insertion condition grading scale with six categories

|                                        | <b>1</b> | <b>2</b>    | <b>3</b>             |
|----------------------------------------|----------|-------------|----------------------|
| <b>(1) Resistance to mouth opening</b> | no       | significant | undue force required |
| <b>(2) Resistance to insertion</b>     | no       | significant | undue force required |
| <b>(3) Swallowing</b>                  | nil      | slight      | gross                |
| <b>(4) Coughing and gagging</b>        | nil      | slight      | gross                |
| <b>(5) Head or body movement</b>       | nil      | slight      | gross                |
| <b>(6) Laryngospasm</b>                | nil      | partial     | total                |

A total score for insertion conditions is calculated by adding up the swallowing, coughing and gagging, movement, and laryngospasm grades (categories 3–6). A score of 4 is considered as optimal conditions for i-gel® insertion.

**eAppendix** Simulation to evaluate the coverage of the confidence interval for the 95% effective dose of remimazolam

- **Simulation design:** data generation process

To mimic the situation in our study, we generated a dataset including 25 patients with more than 6 pairs of success/failure in the same direction. The starting dose and dose spacing were specified as 0.3 and 0.05, respectively. We considered the true dose–response curve to be the one derived by fitting a logistic regression curve with third-degree polynomials to our experiment data obtained from the isotonic regression curve.

Responses were generated based on the true dose–response curve. The simulated responses follow a binomial distribution with a probability  $p$  of success.

$$p = \frac{\exp(\beta_0 + \beta_1 \cdot \text{dose} + \beta_2 \cdot \text{dose}^2 + \beta_3 \cdot \text{dose}^3)}{1 + \exp(\beta_0 + \beta_1 \cdot \text{dose} + \beta_2 \cdot \text{dose}^2 + \beta_3 \cdot \text{dose}^3)}$$

- **Simulation design:** method for CI

Isotonic regression using the pooled adjacent violators algorithm (PAVA) was used to estimate  $ED_{50}$  and  $ED_{95}$  along with their confidence intervals (CIs) derived by bootstrapping.

- **Simulation design:** Performance evaluation

Coverage was calculated as the proportion of the total 100 simulation trials in which the 95% CI of  $ED_{95}$  contains the true  $ED_{95}$  value.

- **Simulation result**

The 95% CI that we have simulated exhibited a coverage of **72%**.

CI = confidence interval;  $ED_{50}$  = 50% effective dose;  $ED_{95}$  = 95% effective dose
